# Supplementary material for: Immune microenvironment, homologous recombination deficiency, and therapeutic response to neoadjuvant chemotherapy in triple-negative breast cancer: Japan Breast Cancer Research Group (JBCRG)22 TR
Source: BMC Med. 2022 Apr 25;20:136. doi: 10.1186/s12916-022-02332-1 (PMC9036790; doi:10.1186/s12916-022-02332-1)
Supplement: Supplementary file 1 — Additional file 1: Figure S1. Image analysis. Representative image of immunofluorescence with the following markers: CD3 (blue), CD4 (yellow), CD8 (red), FoxP3 (pink), CD204 (green), and cytokeratin (brown) (A); tissue segmentation of the intratumoral (red) and stromal (green) areas (B); cell segmentation (C) and cell phenotyping (D) which merged with tissue segmentation (E): cancer cells (orange), CD4+ T cells (yellow), CD8+ T cells (red), CD204+ cells (green), other stromal cells (gray). Figure S2. Immune cell density according to pathological response in each treatment group: group A1 (A), group A2 (B), group B1 (C), group B2 (D). Figure S3. Immune phenotype and pCR. (A) Immune inflamed, high cell density in both cancer cell nests and stromal regions; immune excluded, low cell density in cancer cell nests and high cell density in stromal regions; immune desert, low cell densities in both cancer cell nests and stromal regions. (B) Immune phenotype for CD4+ T cells. (C) Immune phenotype for CD8+ T cells. (D) pCR rate according to immune phenotype for CD4+ T cells and CD8+ T cells. [file 12916_2022_2332_MOESM1_ESM.docx]

**Additional File 1 - Immune microenvironment, homologous recombination deficiency and therapeutic response to neoadjuvant chemotherapy in triple negative breast cancer: Japan Breast Cancer Research Group (JBCRG)22 TR**

Takayuki Ueno1,2*, Shigehisa Kitano3, Norikazu Masuda4,Daiki Ikarashi3, Makiko Yamashita3, Tomohiro Chiba5, Takayuki Kadoya6, Hiroko Bando7, Takashi Yamanaka8, Shoichiro Ohtani9, Shigenori Nagai10, Takahiro Nakayama11, Masato Takahashi12, Shigehira Saji13, Kenjiro Aogi14, Ravindranath M. Velaga15, Kosuke Kawaguchi15, Satoshi Morita16, Hironori Haga17, Shinji Ohno18, Masakazu Toi19

1Breast Surgical Oncology, 2Division of Cancer Genomic Medicine Development, Advanced Medical Development Center, The Cancer Institute Hospital of JFCR, Tokyo, Japan. 3Division of Cancer Immunotherapy Development, Advanced Medical Development Center, The Cancer Institute Hospital of JFCR, Tokyo, Japan. 4Department of Breast and Endocrine Surgery, Nagoya University Graduate School of Medicine, Nagoya, Japan. 5Division of Pathology, The Cancer Institute Hospital of JFCR, Tokyo, Japan. 6Department of Breast Surgery, Hiroshima University Hospital, Hiroshima University, Hiroshima, Japan. 7Breast and Endocrine Surgery, Faculty of Medicine, University of Tsukuba, Ibaraki, Japan. 8Department of Breast and Endocrine Surgery, Kanagawa Cancer Center, Yokohama, Japan. 9Department of Breast Surgery, Hiroshima City Hiroshima Citizens Hospital, Hiroshima, Japan. 10Division of Breast Oncology, Saitama Cancer Center, Saitama, Japan. 11Department of Breast and Endocrine Surgery, Osaka International Cancer Institute, Osako, Japan. 12Department of Breast Surgery, NHO Hokkaido Cancer Center, Sapporo, Japan, 13Department of Medical Oncology, Fukushima Medical University Hospital, Fukushima, Japan. 14Department of Breast Oncology, National Hospital Organization Shikoku Cancer Center, Ehime, Japan. 15Department of Breast Surgery, Kyoto University Hospital, Kyoto, Japan. 16Department of Biomedical Statistics and Bioinformatics, Kyoto University Graduate School of Medicine, Kyoto, Japan. 17Department of Diagnostic Pathology, Kyoto University Hospital, Kyoto, Japan. 18Breast Oncology Center, The Cancer Institute Hospital of JFCR, Tokyo, Japan. 19Department of Breast Surgery, Kyoto University Graduate school of medicine, Kyoto, Japan

**Additional File 1: Figures**


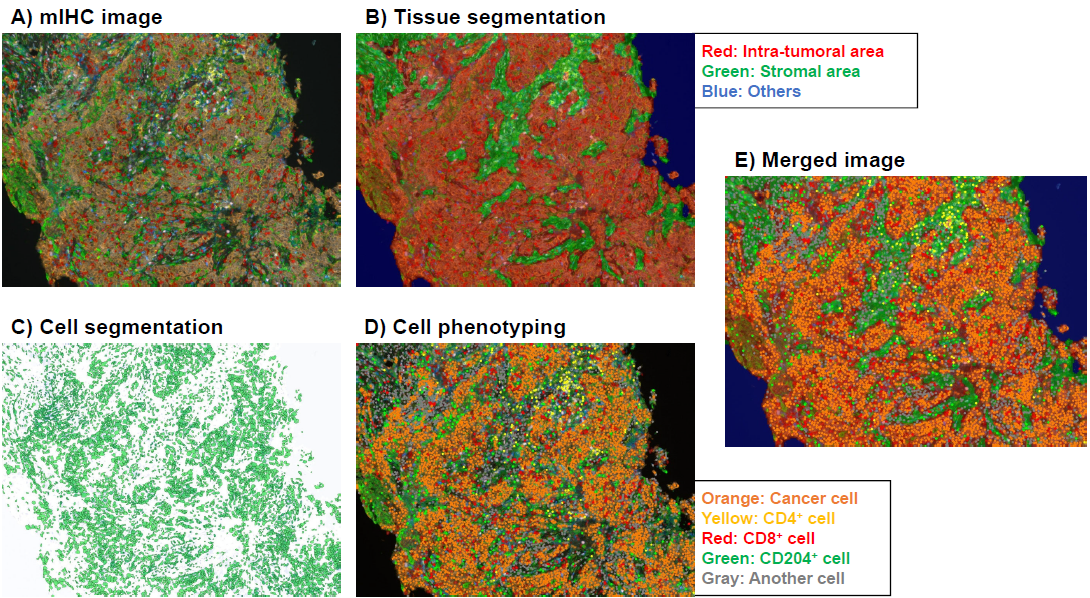


**Figure S1. Image analysis**

**Figure S2. Immune cell density according to pathological response in each treatment group: group A1 (A), group A2 (B), group B1 (C), group B2 (D)**

**Figure S3. Immune phenotype and pCR**
